# Supplementary material for: Postinfective bowel dysfunction following Campylobacter enteritis is characterised by reduced microbiota diversity and impaired microbiota recovery
Source: HighWire-hosted journal article supplement (doi:10.1136/gutjnl-2021-326828), 2022-09-28

A

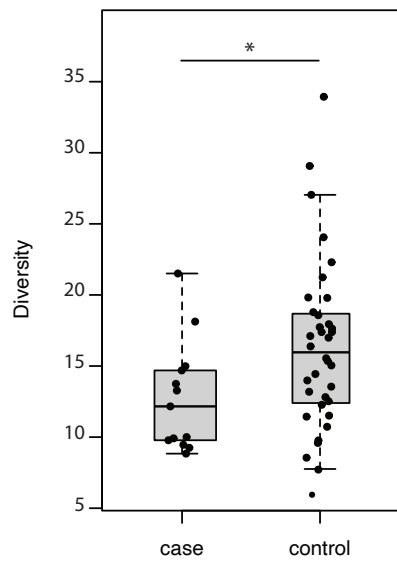

B

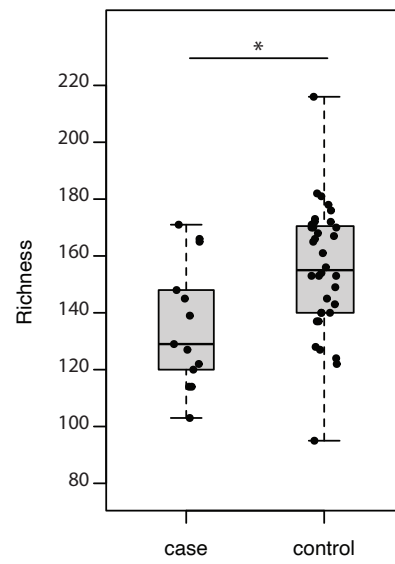

Supplement: gutjnl-2021-326828supp002_data_supplement.pdf [file gutjnl-2021-326828supp002_data_supplement.pdf]
